# Supplementary material
Source: Springer Nature journal article supplement (https://www.springermedizin.de/resource/supplementary/13633_2014_352_MOESM14_ESM.pdf/9596138)
Supplement: MOESM14 [file 9596138]

### Male ISS (# 68)

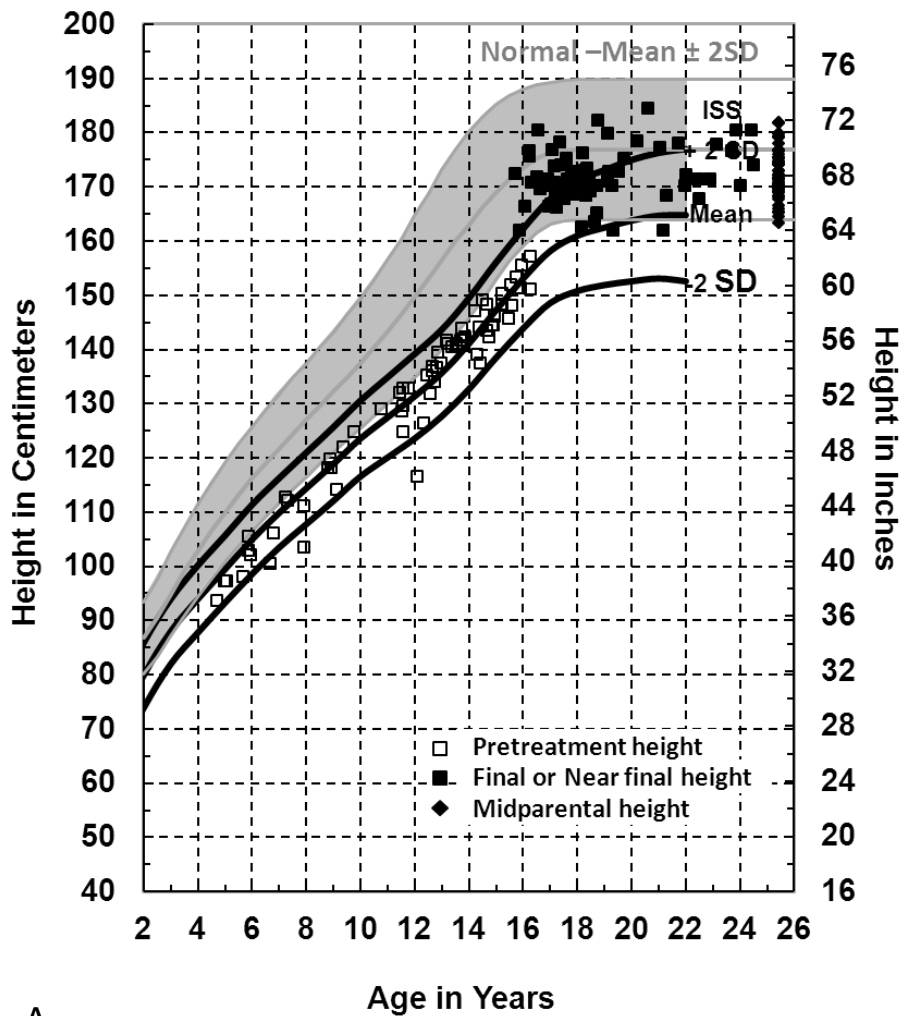

A

### Females ISS (# 20)

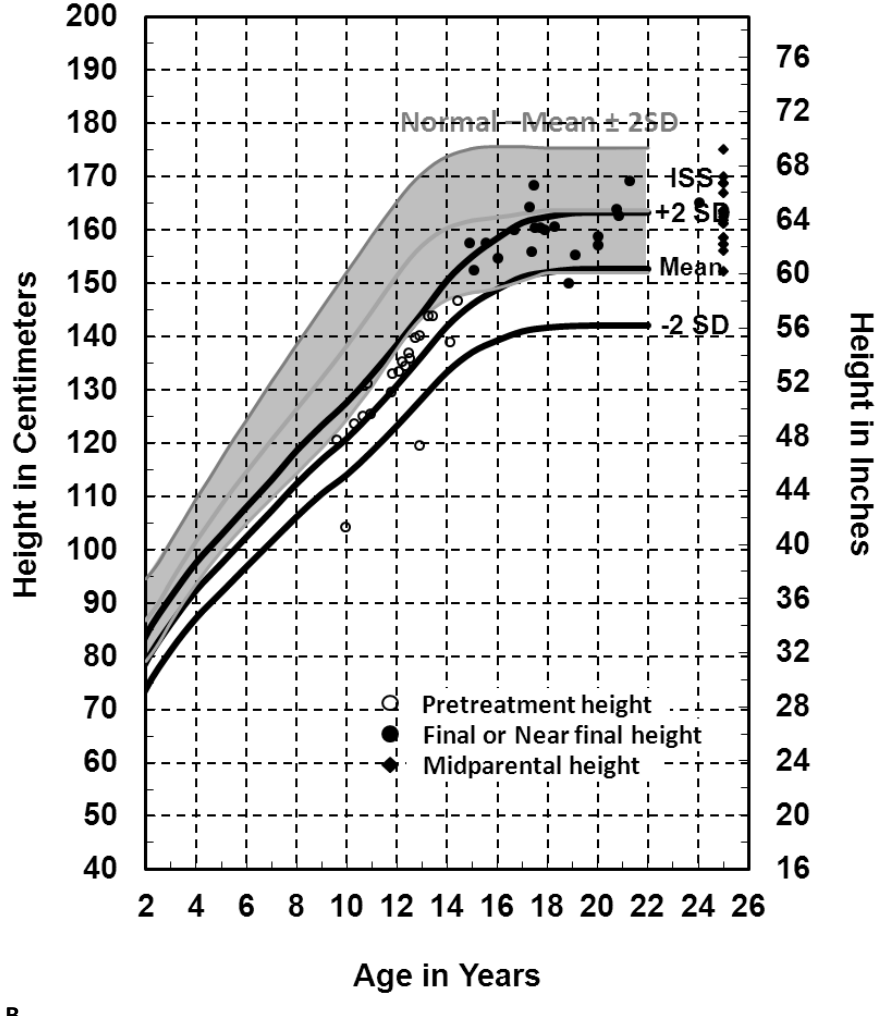

B
